# Supplementary material for: Conversion of amorphous polymer networks to covalent organic frameworks under ionothermal conditions: a facile synthesis route for covalent triazine frameworks
Source: Royal Society of Chemistry journal article supplement (doi:10.1039/c5ta07408h), 2015-01-01
Supplement: c5ta07408h1.pdf [file c5ta07408h1.pdf]

## Supporting Information

### Conversion of amorphous polymer networks to covalent organic frameworks under ionothermal conditions: a facile synthesis route for covalent triazine frameworks

Sophie Kuecken,<sup>a</sup> Johannes Schmidt,<sup>a</sup> Linjie Zhi<sup>b</sup> and Arne Thomas<sup>\*a</sup>

<sup>a</sup>Technische Universität Berlin, Department of Chemistry, Functional Materials, Hardenbergstr. 40, 10623 Berlin

<sup>b</sup>National Center for Nanoscience and Technology of China, No.11, Beiyitiao Zhongguancun, 100190 Beijing, P. R. China

\* arne.thomas@tu-berlin.de

S1. Experimental section – continued

S2. Infrared spectroscopy

S3. Thermogravimetric analysis

S4. Nitrogen sorption analysis

S5. X-ray diffraction analysis

## S1. Experimental Section - continued

### Alternative trimerization protocols to pre-CTFs.

#### HSOCl<sub>3</sub> catalyzed trimerization at RT (procedure according to literature.<sup>S1</sup>)

In a round bottom flask, chlorosulfonic acid (3.41 g, 29.3 mmol) was slowly added to 1,4-dicyanobenzene (0.50 g, 3.90 mmol) at 0 °C. The yellow reaction mixture was allowed to stand for 48 h under ambient conditions. After stopping the reaction with 300 ml ice water, the glassy yellow solid was isolated by vacuum filtration, ground, thoroughly washed with deionized water and EtOH and dried under vacuum for 12 h at 115 °C. The product (0.50 g, quantitative yield) was obtained as a dark yellow solid. FT-IR (ATR, cm<sup>-1</sup>): 1506, 1354, 814. Anal. calcd for C<sub>8</sub>H<sub>4</sub>N<sub>2</sub>: C, 74.99; N, 21.86; H, 3.15. Found: C, 64.49; N, 12.01; H, 4.05.

#### TFMSA catalyzed trimerization at RT

In a round bottom flask, trifluoromethanesulfonic acid (4.39 g, 29.3 mmol) was slowly added to 1,4-dicyanobenzene (0.50 g, 3.90 mmol) at 0 °C. The yellow reaction mixture was allowed to stand for 48 h under ambient conditions. After stopping the reaction with 300 ml ice water, the glassy yellow solid was isolated by vacuum filtration, ground, thoroughly washed with deionized water and EtOH and dried under vacuum for 12 h at 115 °C. The product (0.50 g, quantitative yield) was obtained as a dark yellow solid. FT-IR (ATR, cm<sup>-1</sup>): 1506, 1354, 813. Anal. calcd for C<sub>8</sub>H<sub>4</sub>N<sub>2</sub>: C, 74.99; N, 21.86; H, 3.15. Found: C, 61.34; N, 12.82; H, 3.52.

### Synthesis of CTF-1<sub>open</sub> materials

- For the time dependent synthesis, mixtures of pre-CTF (0.25 g) and ZnCl<sub>2</sub> (0.22 g) were prepared and heated for the desired time (X h). The respective yields are listed in table S1.

Table S1: Yields of CTF-1 materials in dependence of reaction time.

| entry | reaction time | yield |
|-------|---------------|-------|
| 1     | 5 h           | 53%   |
| 2     | 20 h          | 48%   |
| 3     | 40 h          | 52%   |

- To study the influence of the  $\text{ZnCl}_2$  amount, mixtures of pre-CTF (1 eq) and  $\text{ZnCl}_2$  (X eq) were prepared and heated for 40 h. The respective yields are listed in table S2.

Table S2: Yields of CTF-1 materials in dependence of  $\text{ZnCl}_2$  amount.

| entry | equivalents<br>( $\text{ZnCl}_2$ ) | yield |
|-------|------------------------------------|-------|
| 4     | 0.1 eq                             | 62%   |
| 5     | 0.6 eq                             | 52%   |
| 6     | 0.7 eq                             | 58%   |
| 7     | 0.9 eq                             | 44%   |
| 8     | 1.0 eq                             | 38%   |
| 9     | 1.5 eq                             | 32%   |

- To test the sensitivity to air moisture, a mixture of pre-CTF (0.25 g) and  $\text{ZnCl}_2$  (0.22 g) was prepared and exposed to air for 20 min before positioning the crucible in the argon oven and heating at 400 °C for 40 h. A black solid was obtained with 50% yield (see entry 10 in table S3).
- Furthermore, a mixture of pre-CTF (0.30 g) and  $\text{ZnCl}_2$  (1.28 g) was prepared and heated for 20 h at 400 °C and another 20 h at 600 °C. A black solid was obtained with 30% yield (see entry 11 in table S3).

## S2. Infrared spectroscopy

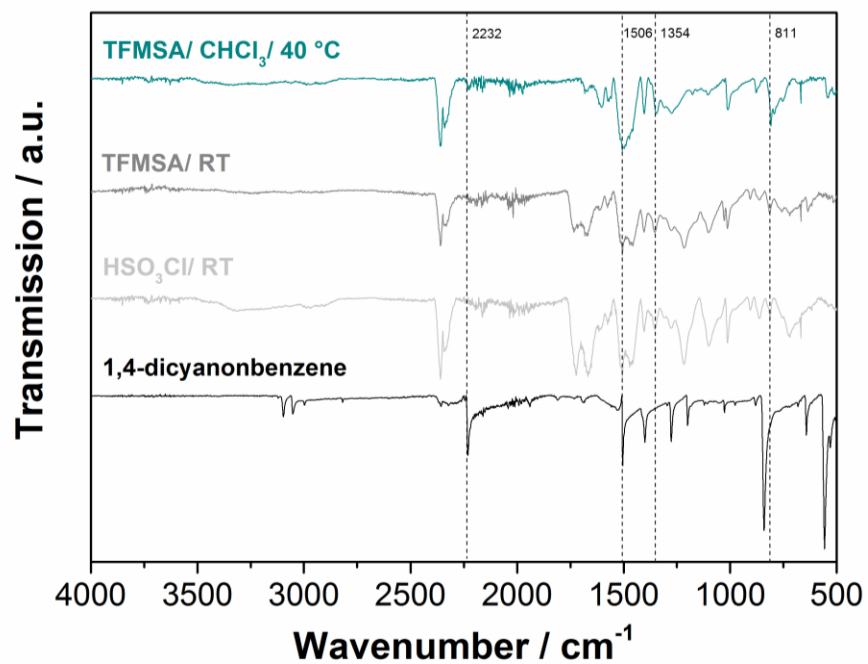

Figure S1: Infrared spectra of three different pre-CTFs (HSO<sub>3</sub>Cl/ RT: light grey, TFMSA/ RT: grey, TFMSA/ CHCl<sub>3</sub>/ 40 °C: cyan) and DCB (black).

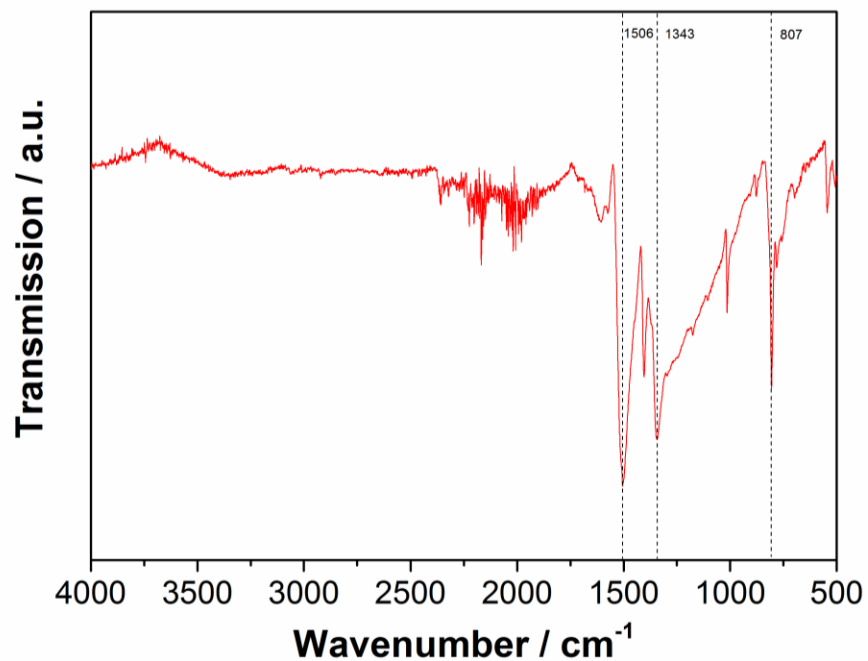

Figure S2: Infrared spectra of CTF<sub>open\_40h</sub> (entry 3).

### S3. Thermogravimetric analysis

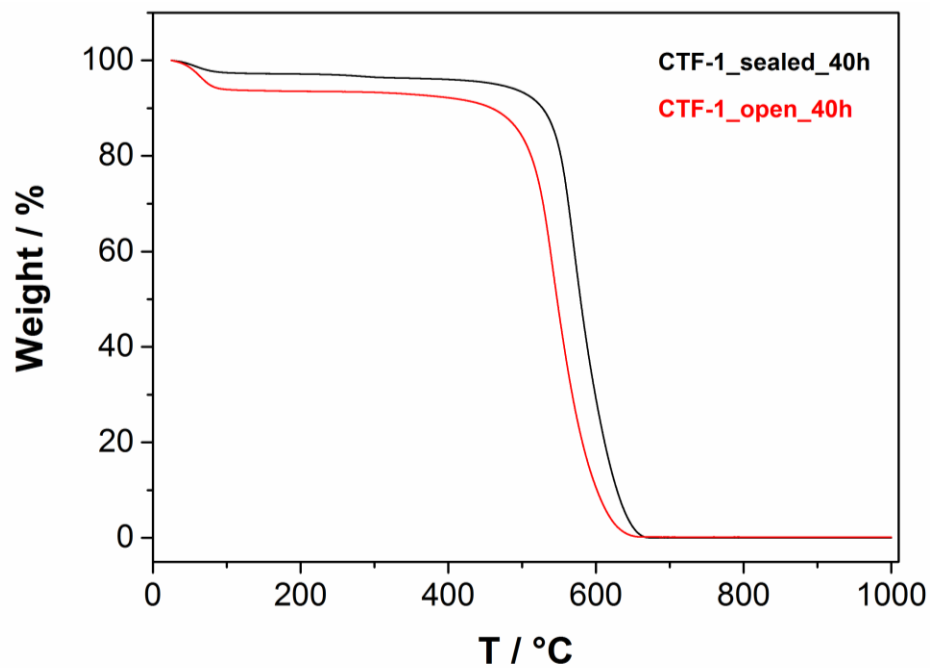

Figure S3: Thermogravimetric analysis of CTF-1\_open\_40h (red) and CTF-1\_sealed\_40h (black) under oxygen (heating rate of  $10\text{ °C min}^{-1}$ ). Residual mass at  $1000\text{ °C}$  is 0.0% for CTF\_sealed and 0.2% for CTF\_open.

### S4. Nitrogen sorption analysis

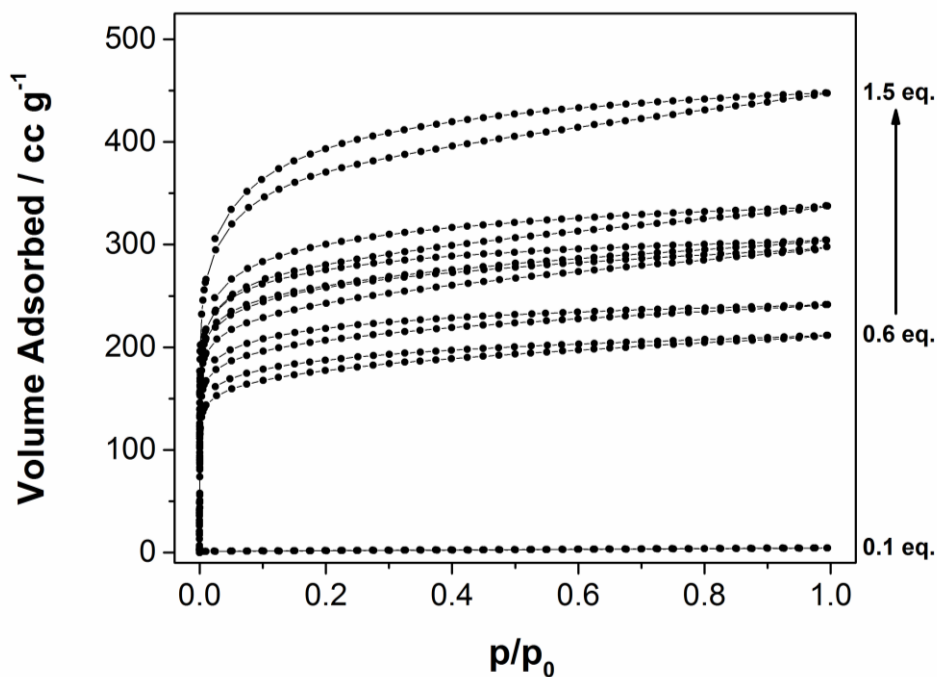

Figure S4: Nitrogen sorption isotherms for CTFs prepared with a series of  $\text{ZnCl}_2/\text{pre-CTF}$  values.

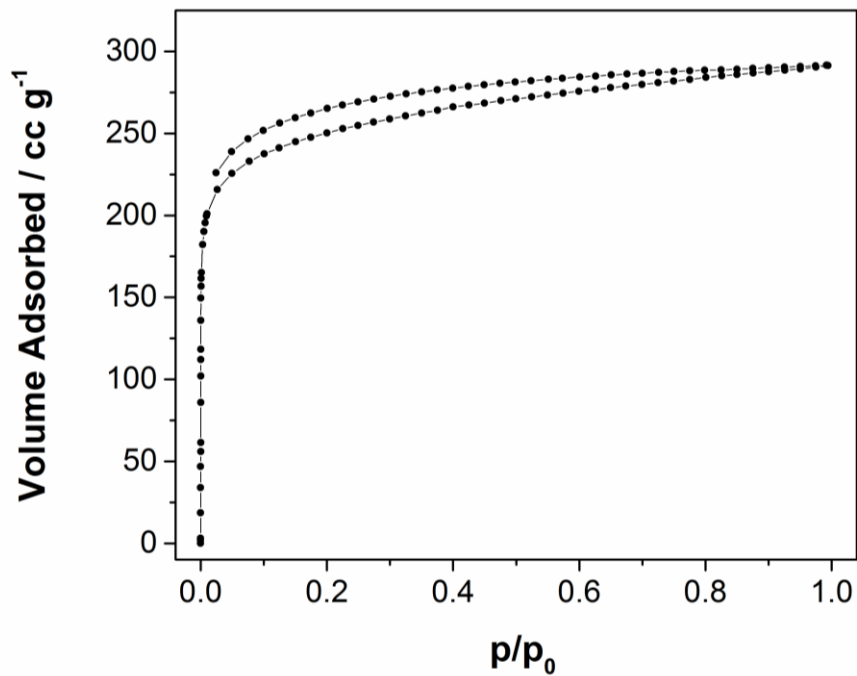

Figure S5: Nitrogen sorption isotherms of CTF-1 prepared from pre-CTF in an open crucible after exposure to air moisture (entry 10).

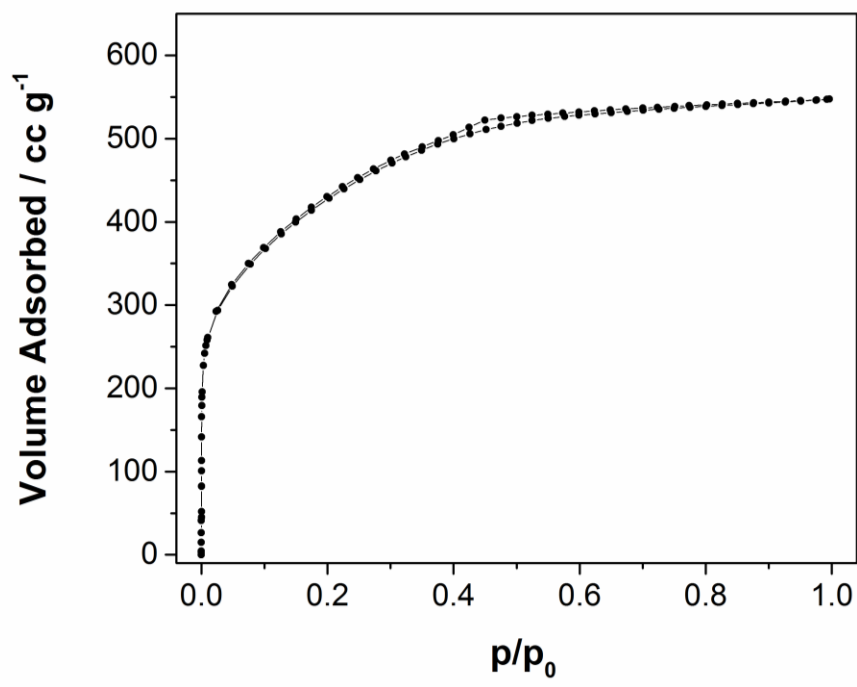

Figure S6: Nitrogen sorption isotherms of CTF prepared from pre-CTF in an open crucible at 600 °C (entry 11).

Table S3: BET surface areas of CTFs prepared in this study.

| entry           | molar ratio<br>ZnCl <sub>2</sub> /pre-CTF | time | SA <sub>BET</sub> in m <sup>2</sup> g <sup>-1</sup> |
|-----------------|-------------------------------------------|------|-----------------------------------------------------|
| 1               | 0.8 eq                                    | 5 h  | 545                                                 |
| 2               | 0.8 eq                                    | 20 h | 828                                                 |
| 3               | 0.8 eq                                    | 40 h | 910                                                 |
| 4               | 0.1 eq                                    | 40 h | n.p.                                                |
| 5               | 0.6 eq                                    | 40 h | 667                                                 |
| 6               | 0.7 eq                                    | 40 h | 781                                                 |
| 7               | 0.9 eq                                    | 40 h | 988                                                 |
| 8               | 1.0 eq                                    | 40 h | 1060                                                |
| 9               | 1.5 eq                                    | 40 h | 1377                                                |
| 10 <sup>a</sup> | 0.8 eq                                    | 40 h | 950                                                 |
| 11 <sup>b</sup> | 4 eq                                      | 40 h | 1551                                                |

<sup>a</sup>after exposure to air moisture, <sup>b</sup>prepared at 600°C

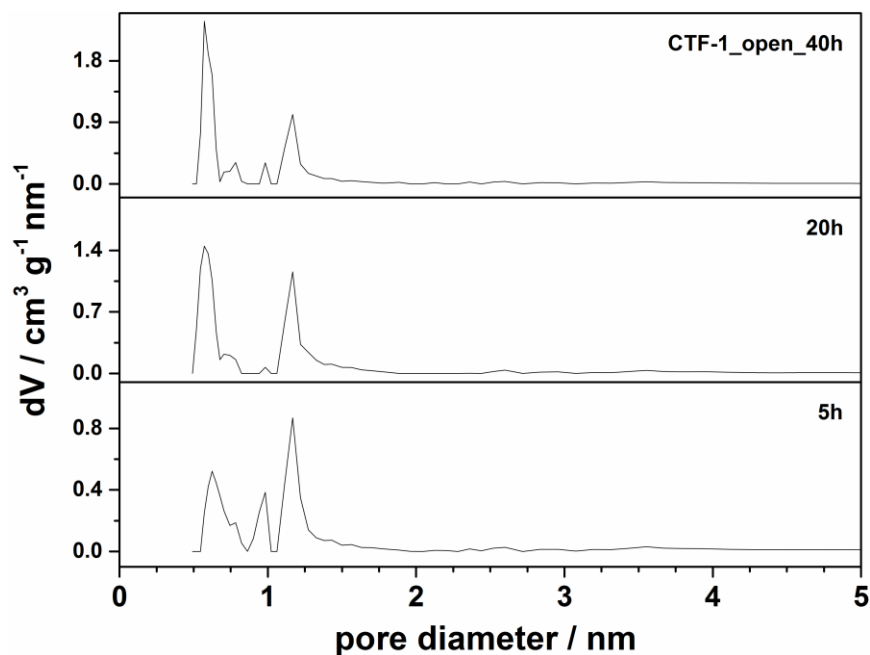

Figure S7: Pore size distribution of CTFs prepared at different reaction times.

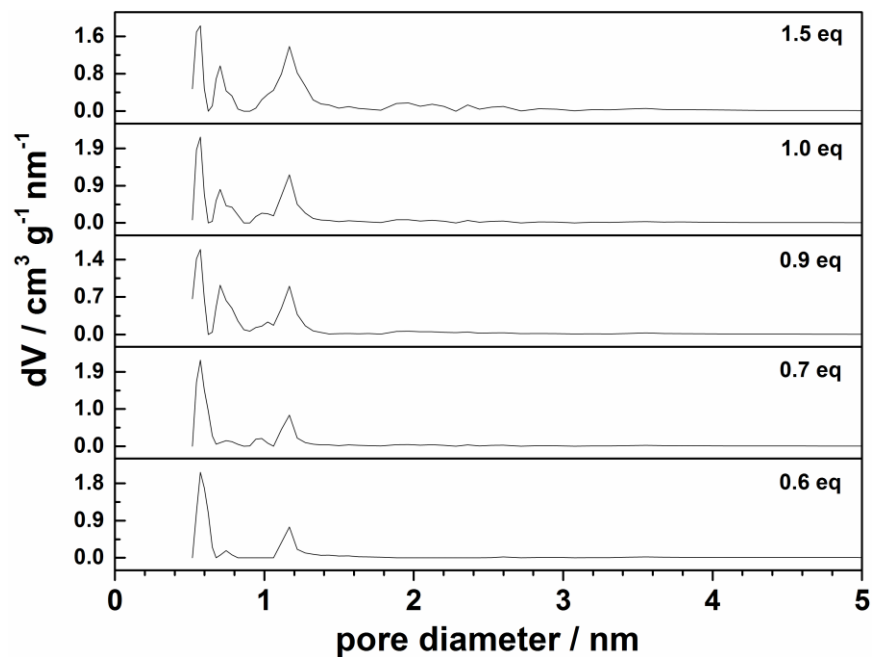

Figure S8: Pore size distribution of CTFs prepared with a series of  $\text{ZnCl}_2/\text{pre-CTF}$  values.

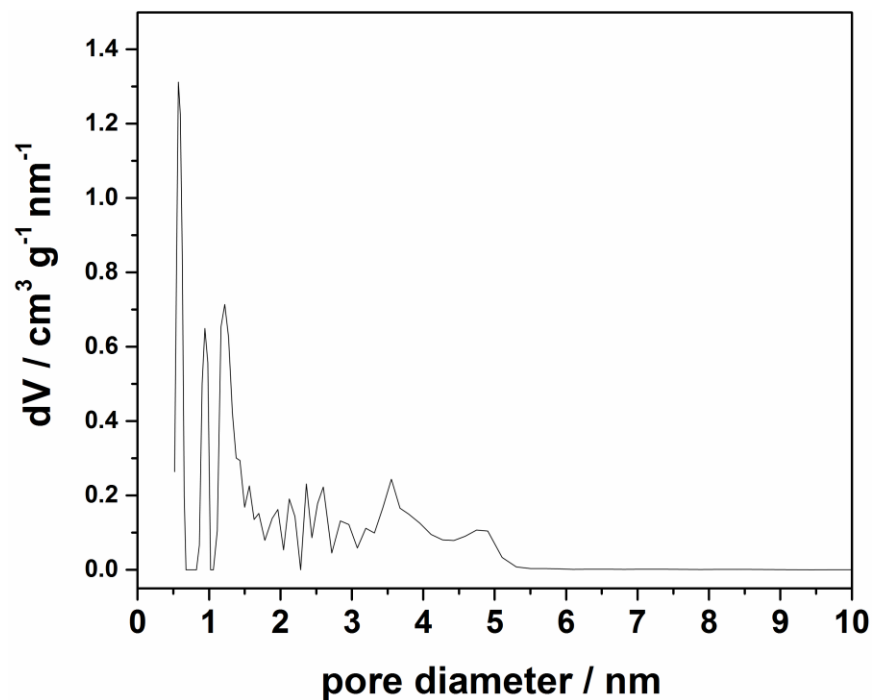

Figure S9: Pore size distribution of CTF prepared from pre-CTF in an open crucible at 600 °C (entry 11).



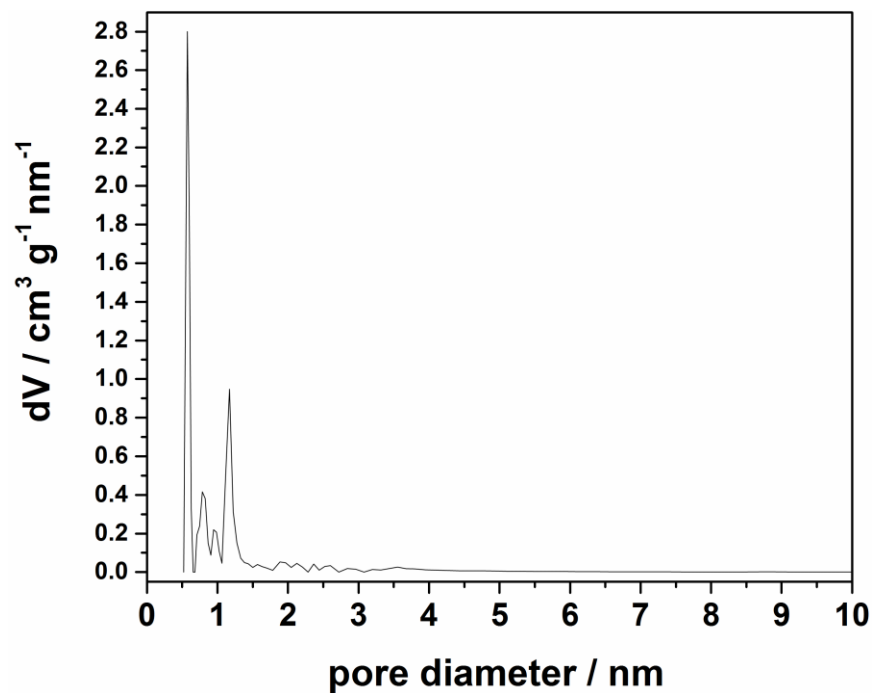

Figure S10: Pore size distribution of CTF-1 prepared from pre-CTF in an open crucible after exposure to air moisture (entry 10).

### S5. X-ray diffraction analysis

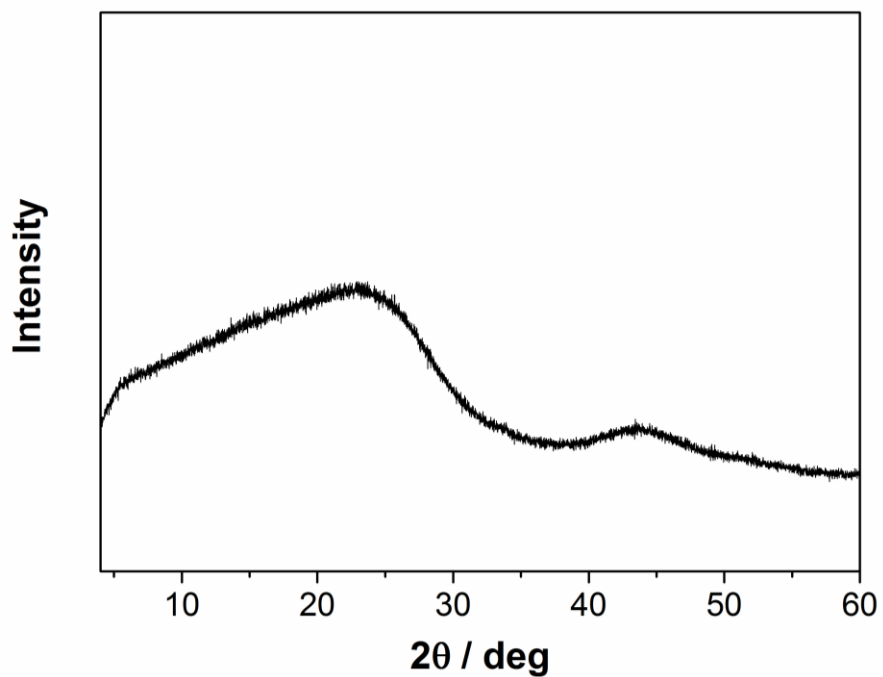

Figure S11: Powder XRD pattern of CTF prepared from pre-CTF in an open crucible at 600 °C (entry 11).

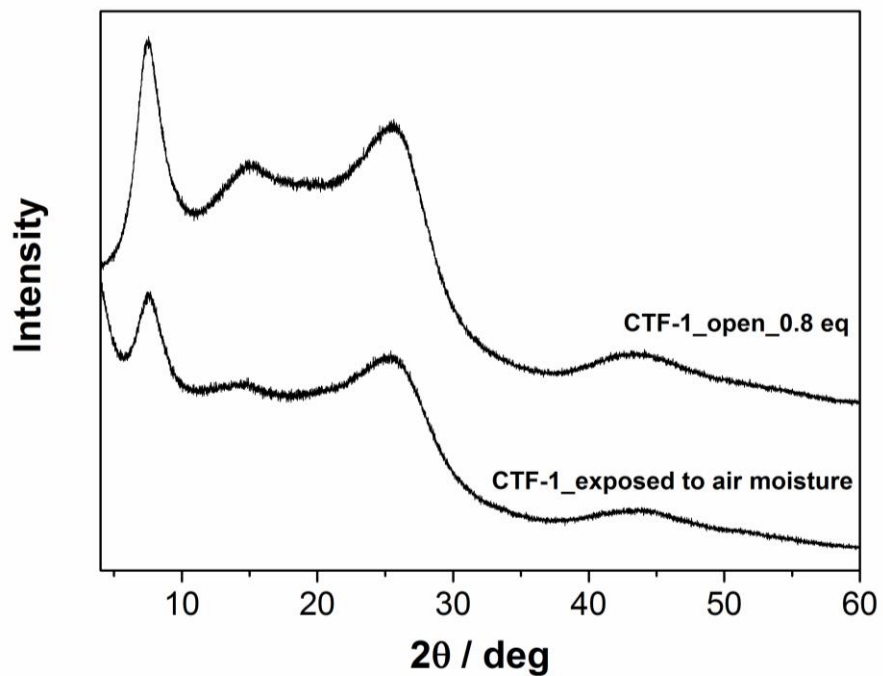

Figure 12: Powder XRD pattern of CTF-1 prepared from pre-CTF in an open crucible after exposure to air moisture (entry 10).

## References

- (S1) Anderson, D. R.; Holovka, J. M.; Corporation, X. *J. Polym. Sci. Part A Polym. Chem.* **1966**, *4*, 1689.
